## Some explanations of stochastic epigenetic mutations

# Greenhouse spatial effects detected in the barley (*Hordeum vulgare* L.) epigenome underlie stochasticity of DNA methylation

1 Moumouni Konate<sup>1</sup>, Michael J. Wilkinson<sup>2\*</sup>, Julian Taylor<sup>3</sup>, Eileen S. Scott<sup>4</sup>, Bettina  
2 Berger<sup>4,5</sup>, Carlos Marcelino Rodriguez Lopez<sup>6\*</sup>

3 <sup>1</sup>Institut de l'Environnement et de Recherche Agricole (INERA), DRREA-Ouest, 01 BP 910  
4 Bobo Dioulasso 01, Burkina Faso; mouni.konate@gmail.com

5 <sup>2</sup>Institute of Biological, Environmental and Rural Sciences, Penglais Campus, Aberystwyth,  
6 Ceredigion, SY23 3EB, UK; mjw19@aber.ac.uk

7 <sup>3</sup>Biometry Hub, School of Agriculture, Food and Wine, Waite Research Institute, The University  
8 of Adelaide, Waite Campus, PMB 1, Glen Osmond, SA 5064, Australia;  
9 julian.taylor@adelaide.edu.au

10 <sup>4</sup>School of Agriculture, Food and Wine, Waite Research Institute, The University of Adelaide,  
11 Waite Campus, PMB 1, Glen Osmond, SA 5064, Australia; Eileen.scott@adelaide.edu.au

12 <sup>5</sup>The Plant Accelerator, Australian Plant Phenomics Facility, School of Agriculture, Food and  
13 Wine, Waite Research Institute, The University of Adelaide, Waite Campus, PMB 1, Glen  
14 Osmond, SA 5064, Australia; Bettina.berger@adelaide.edu.au

15 <sup>6</sup>Environmental Epigenetics and Genetics Group; Department of Horticulture, College of  
16 Agriculture, Food and Environment, University of Kentucky, Lexington, KY 40546, USA;  
17 carlos.rodriguezlopez@uky.edu

### 18 \*Correspondence:

19 Dr Carlos Rodriguez Lopez  
20 carlos.rodriguezlopez@uky.edu;  
21 Prof Mike Wilkinson  
22 mjw19@aber.ac.uk

23 **Keywords: epigenetics, positional effect, phenotypic plasticity, genome by environment, salt**  
24 **stress, MSAP.**

### 25 Abstract

26 Environmental cues are known to alter the methylation profile of genomic DNA, and thereby  
27 change the expression of some genes. A proportion of such modifications may become adaptive  
28 by adjusting expression of stress response genes but others been shown to be highly stochastic,  
29 even under controlled conditions. The influence of environmental flux on plants adds an  
30 additional layer of complexity that has potential to confound attempts to interpret interactions  
31 between environment, methylome and plant form. We therefore adopt a positional and  
32 longitudinal approach to study progressive changes to barley DNA methylation patterns in  
33 response to salt exposure during development under greenhouse conditions. Methylation-  
34 Sensitive Amplified Polymorphism (MSAP) and phenotypic analyses of nine diverse barley  
35 varieties were grown in a randomized plot design, under two salt treatments (0 mM and 75 mM  
36 NaCl). Combining environmental, phenotypic and epigenetic data analyses, we show that at least  
37 part of the epigenetic variability, previously described as stochastic, is linked to environmental  
38 micro-variations during plant growth. Additionally, we show that differences in methylation  
39 increase with time of exposure to micro-variations in environment. We propose that subsequent  
40 epigenetic studies take into account microclimate-induced epigenetic variability.

## Some explanations of stochastic epigenetic mutations

### 41 1 Introduction

42 Plant epigenetic mechanisms that can alter gene expression include the actions of short-interfering  
43 RNAs (siRNAs), chemical modification of histone tails and DNA methylation (Vanyushin, 2006;  
44 Sawan *et al.*, 2008). These have been variously implicated in orchestrating developmental  
45 processes (Kohler and Makarevich, 2006; Ishida *et al.*, 2008; Ay *et al.*, 2014; Jung *et al.*, 2015;  
46 Kooke *et al.*, 2015), cell and organ differentiation (Joyce *et al.*, 2003; Kohler and Makarevich,  
47 2006; Kitimu *et al.*, 2015; Kooke *et al.*, 2015; Konate *et al.*, 2020), reproduction (Yaish *et al.*,  
48 2011; Podio *et al.*, 2014), parental imprinting (Gehring *et al.*, 2006), acquired transgenerational  
49 trait inheritance (Tricker *et al.*, 2013a; Tricker *et al.*, 2013b) and adaptation to stress (Bird and  
50 Jaenisch, 2003; Boyko and Kovalchuk, 2008; Tricker *et al.*, 2012).

51 DNA methylation has emerged as the prominent epigenetic signature for past or contemporary  
52 exposure of a plant to environmental insults (e.g. Xie *et al.* (2017) and has been implicated in the  
53 moderation of stress response (Bird and Jaenisch, 2003; Zilberman and Henikoff, 2007; Boyko  
54 and Kovalchuk, 2008). For instance, Tricker *et al.* (2012) reported that *Arabidopsis thaliana*  
55 responded to high relative humidity stress by suppressing the expression of two genes that control  
56 stomatal development through DNA methylation. DNA methylation has been similarly implicated  
57 in the response of various plant species to a range of stresses, including excess salt (Karan *et al.*,  
58 2012; Konate *et al.*, 2018), temperature extremes (Steward *et al.*, 2002; Bastow *et al.*, 2004;  
59 Hashida *et al.*, 2006; Pecinka *et al.*, 2010; Song *et al.*, 2012), herbivory (Herrera and Bazaga,  
60 2011; Herrera and Bazaga, 2013) and heterogeneous environmental pressure (Wang *et al.*, 2016).  
61 However, the relationship between DNA methylation and the stress effect is imprecise. Many of  
62 the methylation changes observed under stress fail to occur consistently across all genotypes or  
63 populations studied, and many others are not obviously associated with exonic regions. Fewer still  
64 can be directly tied to a particular stress response gene. Such observations have been described as  
65 stochastic (Karan *et al.*, 2012; Tricker *et al.*, 2012), spontaneous (Raj and van Oudenaarden,  
66 2008; Becker *et al.*, 2011; van der Graaf *et al.*, 2015), and without clear triggering factors (i.e.  
67 occurring randomly in the genome independently of stress). Many have considered the random  
68 and spontaneous alteration of DNA methylation is an adaptive biological process in its own right;  
69 one that drives diversity and evolution in a Lamarckian-like fashion (Feinberg and Irizarry, 2010;  
70 Meyer and Roeder, 2014; Soen *et al.*, 2015; van der Graaf *et al.*, 2015; Vogt, 2015) and with the  
71 clear potential to alter fitness (Consuegra and Rodríguez López, 2016). Additionally, Soen *et al.*  
72 (2015) proposed a conceptual framework of random variations in the genome, instigated in  
73 response to environmental cues. They hypothesized that imposition of diverse types of stress upon  
74 individual organisms during development gives rise to an adaptive improvisation which deploys  
75 random phenotypic variations that allows some individuals to cope with unstable ambient  
76 conditions. However, the authors did not suggest an epigenetic mechanism that might be involved  
77 in the regulation of such adaptive phenotypic variation.

78 In a pivotal piece, Vogt (2015) provided insight into the concept of random variability. The author  
79 linked 'stochastic developmental variation' to stochastic occurrence of DNA methylation (Bird  
80 and Jaenisch, 2003; Field and Blackman, 2003). However, Vogt did not consider in depth the  
81 possible role that microclimatic variation may play in this apparent stochasticity. Herrera and  
82 Bazaga (2010) suspected a role for mesoclimate in driving the epigenetic variability of natural  
83 populations but did not anticipate marked environmental differences to occur under controlled  
84 experimental conditions (greenhouse, growth room).

85 Moreover, since genome-by-environment interactions have been shown to be at least partially  
86 regulated by DNA methylation (Verhoeven *et al.*, 2010), even minor perturbations of growing  
87 conditions attributable to positional effects within a controlled growing environment has the  
88 potential to introduce confounding variation in methylation patterning. One way of dealing with

## Some explanations of stochastic epigenetic mutations

89 spatial variation, if it cannot be prevented, is to deploy an appropriate experimental design in  
90 order to distinguish treatment from positional effects (Brien *et al.*, 2013; Cabrera-Bosquet *et al.*,  
91 2016). Experimental design normally accounts for such variability by combining blocking and  
92 randomization, along with appropriate statistical analyses (Addelman, 1970; Ruxton and  
93 Colegrave, 2011). Despite the usefulness of this approach, experimental design cannot entirely  
94 remove environmental variability (microclimate). This presents a potential challenge when  
95 attempting to link changes in DNA methylation to environmental stimuli. It is difficult to  
96 discriminate between the so-called stochastic methylation and position-dependent methylation  
97 due to the capacity of plants to promptly sense and epigenetically respond to subtle variation in  
98 ambient conditions (Gutzat and Mittelsten Scheid, 2012; Meyer, 2015).

99 In the present study, we combine Methylation-Sensitive Amplified Polymorphism (MSAP) and  
100 phenotypic analyses to assess the effect of microclimate on DNA methylation of barley plants  
101 growing under greenhouse conditions. Nine spring barley varieties were grown in a randomized  
102 plot design under mild soil salt stress or control conditions. Environmental, phenotypic and DNA  
103 methylation data collected at two time points are used to explore whether stochastic epigenetic  
104 may be linked to trivial environmental fluctuations. We also explore how phenotypic variability  
105 observed in these experiments correlates with differences in DNA methylation patterns.

## 106 2 Materials and Methods

### 107 2.1 Plant material and experimental design

108 Nine varieties of spring barley (Table 1) were grown in a controlled temperature greenhouse at  
109 the Plant Accelerator<sup>®</sup> (Australian Plant Phenomics Facility (APPF), Waite Campus, University  
110 of Adelaide, Australia) from 26 June to 12 October 2013. Varieties with similar flowering times  
111 (Menz, 2010) were selected to minimize discrepancies in sampling times between varieties. The  
112 experiment comprised eight randomized blocks with two plants of the same variety per plot  
113 (Figure 1). Three seeds were sown in white pots (20 cm height × 15 cm diameter, Berry Plastics  
114 Corporation, Evansville, USA) containing 2400 g potting mixture (composed of 50% UC  
115 (University of California, Davis) potting mix, 35% coco-peat and 15% clay/loam (v/v)). Seedlings  
116 were thinned to one seedling per pot 2 weeks after sowing. Two soil salt treatments (0 mM and 75  
117 mM NaCl ('control' and 'salt stress', respectively, hereafter) were applied to three-leaf stage  
118 seedlings (25 days after sowing (DAS)), using the protocol described by Berger *et al.* (2012). Pots  
119 were watered every 2 days for up to 60 days after sowing to 16.8% (g/g) gravimetric water  
120 content, corresponding to 0.8 × field capacity. From day 61 after sowing, plants were watered  
121 daily to 16.8% (g/g) until seed set. Leaf samples (50-100 mg) were taken for DNA extraction  
122 from blocks 1, 3, 4, 6 and 8 (Figure 1) at two time points, viz.: 4<sup>th</sup> leaf blade after full emergence  
123 (15 days after salt treatment and 40 DAS) and flag leaf blade from the primary tiller at anthesis  
124 (62 days after salt treatment and 87 DAS). Samples were immediately snap frozen in liquid  
125 nitrogen and stored at -80 °C until DNA extraction. Whole plants were harvested at maturity and  
126 above-ground biomass was dried and weighed.

### 127 2.2 Greenhouse environmental conditions

128 The experiment was conducted in a 24 m<sup>2</sup> greenhouse (~8 m x 3 m), with a gable roof 4.5 m  
129 above the floor at the lowest and 6 m at the highest point. The greenhouse (34°58'16 S,  
130 138°38'23 E) was oriented West-East (Figure 1). To investigate the possible causes of position  
131 dependent variability of barley response across the greenhouse, environmental factors  
132 (temperature, relative humidity and photosynthetic active rate) were recorded during the same  
133 period of the year (26 June to 12 October 2015), using four sensor-nodes located along the  
134 benches (Figure 1). Based on this period of the year, we deemed daytime to be between 7 AM and  
135 6 PM.

## Some explanations of stochastic epigenetic mutations

136 The sensor-nodes were positioned 2 metres apart and 1 metre from the east and west walls (Figure  
137 1). Each node had a combination of sensors for photosynthetic active radiance (PAR) (model  
138 Quantum, LI-COR, Lincoln, Nebraska, USA) and for humidity/temperature (Probe HMP60,  
139 Vaisala INTERCAP<sup>®</sup>, Helsinki, Finland). Environmental data was recorded every minute for the  
140 duration of the experiment using wireless data loggers (National Instruments, Sydney, New South  
141 Wales, Australia). Before use for further analyses, recorded data were quality controlled to  
142 remove time slots when data were not present for all four nodes. To show the overall daily  
143 fluctuation of environmental factors between sensor-nodes during the experiment, the average  
144 measure of each factor per hour was plotted for each node. Then, the vapour pressure deficit  
145 (VPD) for each time point was calculated according to Murray (1967):

$$VPD = \left(1 - \left(\frac{RH}{100}\right)\right) * \left(610.7 * 10^{\frac{7.5T}{(237.3+T)}}\right)$$

146 Where RH = relative humidity, T = temperature, and the factor  $610.7 * 10^{\frac{7.5T}{(237.3+T)}}$  = saturated  
147 vapour pressure (SVP).

148 Pairwise comparisons of each environmental factor at sensor-node positions were performed  
149 using the Wilcoxon signed-rank test (Wilcoxon, 1945), on the R package “*ggpubr*” (Kassambara,  
150 2019). These comparisons were performed independently for day and night periods.

### 151 2.3 DNA extraction

152 Frozen plant material was homogenized in a bead beater (2010-Geno/Grinder, SPEX  
153 SamplePrep<sup>®</sup>, USA) prior to DNA extraction using a Qiagen DNeasy kit according to the  
154 manufacturer’s instructions. DNA samples were then quantified in a NanoDrop<sup>®</sup> 1000  
155 Spectrophotometer (V 3.8.1, ThermoFisher Scientific Inc., Australia) and concentrations were  
156 standardized to 10 ng/μl for subsequent MSAP analyses.

### 157 2.4 MSAP

#### 158 2.4.1 DNA restriction and adapter ligation

159 MSAP was used for the DNA methylation profiling of barley plants according to the method of  
160 Rodríguez López *et al.* (2012). To ensure marker reproducibility, DNA samples were analysed in  
161 two technical replicates. Thus, samples were digested using a methylation insensitive restriction  
162 enzyme *EcoRI* in combination with either *HpaII* or *MspI* (isoschizomers), which show differential  
163 sensitivity to cytosine methylation at CCGG positions. Digested DNA fragments were ligated to  
164 adapters (Table 1) with one end cohesive with restriction products generated by *EcoRI* or  
165 *HpaII/MspI*. Digestion and ligation reactions were performed in a single solution of 11 μl  
166 comprising: 1.1 μl T4 ligase buffer; 0.1 μl *HpaII*; 0.05 μl *MspI*; 0.25 μl *EcoRI*; 0.05 μl T4 ligase;  
167 0.55 μl BSA ; 1.1 μl NaCl ; 1 μl Adapter *EcoRI*; 1 μl Adapter *HpaII/MspI*; 5.5 μl DNA sample  
168 and 0.3 μl pure water. Enzymes and buffer were acquired from New England Biolabs, Australia  
169 (NEB) and oligos were produced at Sigma-Aldrich, Australia. The solution was incubated for 2h  
170 at 37°C, then enzymes were inactivated at 65°C for 10 min.

#### 171 2.4.2 PCR

172 Two PCR amplifications were performed using products of the restriction/ligation reaction. First,  
173 a pre-amplification PCR was performed, in which primers complementary to adaptors but with 3’  
174 overhangs for a unique nucleotide (*HpaII/MspI* primer +C and *EcoRI* primer +A, Table 1) were  
175 used in a pre-optimised PCR master mix (BioMix<sup>™</sup>, Bionline, Meridian Bioscience; Australia)  
176 following the manufacturer’s instructions. DNA digestion/ligation product (0.5 μl) was used for  
177 PCR amplification, with the following profile as per Rois *et al.* (2013): 72□ for 2 min, 29 cycles



## Some explanations of stochastic epigenetic mutations

178 of 30 s denaturing at 94°C, 30 s annealing at 56°C and 2 min extension at 72°C, ending with 10 min  
179 at 72°C to ensure completion of the extension.

180 Pre-amplification products were quality assessed by 1% w/v agarose electrophoresis (80V for 2  
181 h), before performing the selective amplification using two selective primer combinations,  
182 *EcoRI*\_AAG vs. *HpaII/MspI*\_CCA and *EcoRI*-ATG vs. *HpaII/MspI*\_CAA. Amplified fragment  
183 detection through capillary electrophoresis was facilitated by labelling *HpaII/MspI* selective  
184 primers with the 6-FAM reporter molecule (6-CarboxyFluorescein). Just 0.3 µl of pre-  
185 amplification product was used in the pre-optimised PCR master mix and the PCR was performed  
186 as follows (Rois *et al.*, 2013); 94°C for 2 min, 12 cycles of 94°C for 30 s, 65°C (and decreasing by  
187 0.7°C each cycle) for 30 s, and 72°C for 2 min, followed by 24 cycles of 94°C for 30 s, 56°C for 30  
188 s, and 72°C for 2 min, ending with 72°C for 10 min.

### 189 2.4.3 Capillary electrophoresis

190 The products of the selective PCR were fractionated by capillary electrophoresis on an ABI  
191 PRISM 3730 (Applied Biosystems, Foster City, California, USA) at the Australian Genome  
192 Research Facility Ltd (Adelaide, Australia). For this, 2 µl of selective PCR products were first  
193 combined with 15 µl of HiDi formamide (Applied Biosystems) and 0.5 µl of GeneScan™ 500  
194 ROX™ Size Standard (Applied Biosystems). The mixture was then denatured at 95°C for 5 min  
195 and snap-cooled on ice for 5 min before sample fractionation at 15 kV for 6 s and at 15 kV for 33  
196 min at 66°C.

### 197 2.4.4 MSAP data analysis

198 MSAP profiles obtained using *HpaII* and *MspI* were used to generate; 1) a qualitative binary  
199 matrix of allelic presence/absence scores, and 2) a quantitative matrix of allelic peak height using  
200 GeneMapper Software v4 (Applied Biosystems). Qualitative epigenetic changes associated with  
201 greenhouse positional effect were analysed using fragment sizes between 100 and 550 base pairs,  
202 which were selected to estimate epigenetic distance between individual plants (EpiGD) and  
203 subpopulations of plants (PhiPT) and perform Principal Coordinate Analyses (PCoA), using  
204 GenAlex 6.501 (Peakall and Smouse, 2012).

205 Quantitative analysis of peak height was used to examine the effect of position on the methylation  
206 status of individual loci. We searched for MSAP markers that were differentially methylated  
207 between experimental blocks by comparing the fragment peak heights to survey for position  
208 effects on the plant methylation profile (Rodríguez López *et al.*, 2012). Before differential  
209 methylation analysis, model-based normalization factors were calculated for the peak height  
210 libraries using the weighted trimmed mean method of Robinson and Oshlack (2010). For each  
211 variety and sampling method, peak heights were extracted and analysed individually using the  
212 modelling approach of McCarthy *et al.* (2012). To ensure the peak heights could be compared  
213 between positions, the individual models contained a term to account for variation between blocks  
214 as well as a term to capture the differences between the control and salt stress treatments. A  
215 likelihood ratio test was then performed to determine whether estimated coefficients for the  
216 positions were equal (McCarthy *et al.*, 2012). The p-values from these tests were then adjusted for  
217 multiple comparisons using the false discovery rate method of Benjamini and Hochberg (1995).  
218 Analyses were conducted using the R package *edgeR* (Robinson *et al.*, 2010), in the R statistical  
219 computing environment (R Core Team, 2019).

220 The extent of epigenetic divergence between salt treatments at the two developmental stages (4<sup>th</sup>  
221 leaf and anthesis) was assessed, first by performing a multiple correspondance analysis (MCA) on  
222 MSAP marker data. A linear discriminant analysis (LDA) was then performed on the MCA  
223 results. These analyses, referred to as MC-LDA thereafter, were done using the R packages

## Some explanations of stochastic epigenetic mutations

224 FactoMineR and MASS (Lê *et al.*, 2008; R Core Team, 2019). To visualise the results of  
225 comparisons involving more than two groups, the first two linear discriminant factors (LD1 and  
226 LD2) were plotted. Otherwise, a density plot of LD1 was performed.

### 227 **2.5 Assessment of correlations between epigenetic profiles and plant phenotype**

228 Epigenetic and phenotypic variability were estimated using averaged data per position for all nine  
229 barley varieties (Bishop *et al.*, 2015). The software GraphPad Prism 6 v008 (Graph-Pad Software,  
230 San Diego, California, USA) was used to perform statistical analyses. Values of above-ground  
231 plant biomass were normalized by computing the ratio of plant biomass over the mean biomass  
232 for each individual experiencing the same treatment across all positions. The same formula was  
233 applied to grain yield. This normalization was intended to address quantitative variability between  
234 treatments and among barley genotypes. Then, biomass and yield distance matrices were  
235 generated using the difference between normalized values of any two individual plants.

236 We performed a Mantel Test (Mantel, 1967) to estimate the significance of the correlations  
237 between epigenetic distance and plant biomass, and position in the greenhouse. For this, we used  
238 matrices generated from epigenetic distance, physical distance and phenotypic (biomass or yield)  
239 differences estimated as described above. In all cases, the level of significance of the observed  
240 correlations was tested using 9,999 random permutations. Since both enzymes (*HpaII*, *MspI*) are  
241 methylation sensitive (Walder *et al.*, 1983; Reyna-López *et al.*, 1997), these enzymes can  
242 independently show epigenetic marks across the genome. Therefore, our inferences about plant  
243 epigenetic profile thereafter relate to results obtained using either enzyme or a combination of  
244 both.

## 245 **3 Results**

### 246 **3.1 Microclimatic variability in the greenhouse**

247 Data quality control of climatic data provided 47,144 and 54,983 time-points of data recording for  
248 the periods of day and night, respectively. These correspond to time-points when recording was  
249 obtained simultaneously in all sensor-nodes. There was clear evidence of both spatial and  
250 temporal variation for temperature, photosynthetically active radiation (PAR) and relative  
251 humidity (RH) within the experimental area (Figures 2 and 3).

252 The average dynamics of climatic data in the greenhouse showed a higher PAR between 8 AM  
253 and 10 AM at the East side than the rest of the greenhouse (node D, Figure 1). The PAR was also  
254 variable during the day between node positions, with sensor-node B (Centre-West, Figure 1)  
255 recording the lowest PAR values around 12 PM (Figure 2A). The average temperatures evolved  
256 broadly in the same way at all node positions, with only around 1.5 °C difference between the most  
257 divergent nodes at the warmest time of day (Figure 2B). The RH was the highest at node A (West  
258 side of the greenhouse, Figure 1) during both day and night, and was significantly different from  
259 the rest of the positions during the day (Figures 2C and 3). The node D (East end of the  
260 greenhouse) presented the lowest RH during the day; it was not significantly different from nodes  
261 B and C (Figure 3A).

262 Although there was no clear evidence of gradient between sensor-nodes for any of the climatic  
263 factors (i.e. RH, temperature, VPD and PAR, the pairwise comparison of data from sensor-nodes  
264 using Wilcoxon paired signed-rank test showed significant differences between positions for each  
265 variable (Figure 3A-G). Such differences were present during both day and night periods in the  
266 greenhouse. The RH appeared particularly variable at night between all positions of sensor-nodes  
267 (Figure 3B).

## Some explanations of stochastic epigenetic mutations

### 268 3.2 Correlation between DNA methylation profile and plant position in the greenhouse

269 Plant DNA methylation profiles derived from MSAP data generated 269 alleles with sizes  
270 between 100 and 550 base pairs across samples from all nine barley varieties. PCoA of MSAP  
271 profiles for barley variety at anthesis showed grouping of samples more by plant position than salt  
272 treatment, regardless of the enzyme combination used (Figures 4A and B). The first coordinate  
273 Eigen space matched with the position of the plants in the greenhouse in the West-East direction  
274 (Figure 4). The Mantel test using all treatment samples together showed weak correlations  
275 between plant epigenetic profiles and plant positions in the greenhouse at 4<sup>th</sup> leaf stage, and more  
276 significant correlations at anthesis (Table 3). For instance, for the variety Schooner, the Mantel test  
277 between pairwise epigenetic distance and plant position at the 4<sup>th</sup> leaf stage of barley development  
278 resulted in weak correlations for both *HpaII* ( $R^2 = 0.11$ , P-value = 0.025, Figure 5A) and *MspI*  
279 ( $R^2 = 0.12$ , P-value < 0.022, Figure 5C). Apart from two varieties (Buloke and Schooner), none of  
280 the remaining varieties showed a significant correlation between position and epigenetic profile at  
281 the 4<sup>th</sup> leaf stage (Table 3, Figures S1). Conversely, these correlations were stronger at anthesis  
282 for the same variety Schooner ( $R^2 = 0.48$  and  $R^2 = 0.45$ , for *HpaII* and *MspI*, respectively, Figure  
283 5B and D), with greater significance of the P-values (0.001). Additionally, all the remaining  
284 varieties showed significant correlation (P-value at least < 0.05) between DNA methylation  
285 profile at anthesis and the plant position in the greenhouse (Table 3; Figure S1). The correlations  
286 at anthesis were high ( $R^2 > 0.3$ ) for all varieties, except Buloke and Maritime (Table 3).

287 The comparison of peak heights of MSAP markers generated from plants growing in different  
288 positions revealed significant differences between positions for some alleles (Figure 6). In  
289 general, significant differences in peak height were observed between plants in position P1 and  
290 the other positions (Figure 6). Overall, peak heights showed logarithmic trends (both positive and  
291 negative), significantly associated with the West-East distribution of the samples. A few markers  
292 were significantly different in peak heights over all positions (Table 4).

293 However, positional effect did not thwart the ability to differentiate between salt-stressed and  
294 control plants. The MC-LDA on MSAP marker data was able to separate salt stressed plants from  
295 those given control conditions (Figures 7A-B). Furthermore, epigenetic divergence between  
296 treatment groups increased with time, with control and stress plants consistently more similar at  
297 the 4<sup>th</sup> leaf stage than at anthesis across all varieties (Figures 7 A-B and S2). MC-LDA of salt  
298 treatments could nevertheless discriminate treatments at both stages even though epigenetic  
299 divergence was strongly influenced by developmental stage (Figures 7 C and S2).

### 300 3.3 Correlations between barley phenotype, epigenome and position

301 There was a clear trend in the final biomass of all nine barley varieties according to position, with  
302 a progressive increase from position P1 (West side of the greenhouse) to position P5 (East side)  
303 (Figure 8A). This relationship was a logarithmic trend, both in the control and stressed plants. The  
304 average grain yield of the barley varieties showed the same West-East trend as the biomass  
305 (Figure 8B). However, when varieties were examined separately, both logarithmic and  
306 polynomial trends were observed (Figure S3).

307 Assessment of the relationship between pairwise differences in epigenetic distance and in grain  
308 yield showed significant correlations (P-values < 0.05) in control plants of six of nine varieties  
309 (Buloke, Commander, Fathom, Maritime, Schooner, Yarra), with  $R^2$  varying between 0.247 and  
310 0.907 (Table 5; Figure S4). Likewise, stress plants showed significant correlations (P-values at  
311 least < 0.05) between grain yield and methylation profile in six varieties (Barque 73, Buloke,  
312 Commander, Flagship, Maritime, Schooner), with  $R^2$  between 0.164 and 0.921 (Table 5; Figure  
313 S4). An example of significant correlations between grain yield and epigenetic distance is  
314 presented in Figure 9A-D, for the variety Schooner.

## Some explanations of stochastic epigenetic mutations

### 315 4 Discussion

#### 316 4.1 Stochastic DNA methylation is explained by microclimatic differences

317 The randomized block design aims to minimise unexplained variation between treatments, and  
318 has emerged as a preferred method in plant field trials and in controlled environment experiments  
319 (Edmondson, 1989; Guertal and Elkins, 1996; Brien *et al.*, 2013). However, while block  
320 homogeneity is difficult to achieve, variability between blocks in the same experimental setting is  
321 often either ignored, attributed to randomness (Raj and van Oudenaarden, 2008; Karan *et al.*,  
322 2012; Tricker *et al.*, 2012) or in the context of epigenetic research, explained by spontaneous  
323 occurrence of the methylation (Becker *et al.*, 2011; Baulcombe and Dean, 2014; van der Graaf *et*  
324 *al.*, 2015).

325 In this study, we found evidence suggesting that microclimatic variation within a greenhouse was  
326 sufficient to trigger variability in the plant DNA methylation profile in a manner that was both  
327 independent of the experimental treatment and greater in magnitude. The clarity of the climatic  
328 variables measured across the experimental blocks, and the associated cline in methylation  
329 patterning is suggestive that each plant experienced a unique combination of climatic factors  
330 during the experimental period, and that this induces, at least partly, changes in methylation  
331 patterning. Similar observations were also reported for other greenhouse studies (Brien *et al.*,  
332 2013; Both *et al.*, 2015; Cabrera-Bosquet *et al.*, 2016). This finding is inconsistent with  
333 spontaneous DNA methylation being entirely responsible for the plant-plant variability in such  
334 experiments (Becker *et al.*, 2011; van der Graaf *et al.*, 2015), and throws into question how best  
335 to discriminate epigenetic responses to micro-environment fluctuations from those attributable to  
336 stochastic noise. Moreover, the effect of position can easily be overlooked in snap-shot exposure  
337 experiments, since the timeframe from stress exposure to induction of position-dependent  
338 methylation markers is critical but also likely to vary between loci. Support for this reasoning can  
339 be taken from our findings that it was possible to separate salt and control samples by  
340 discriminate analysis at the 4<sup>th</sup> leaf stage and at anthesis but with higher divergence at the later  
341 stage. At the same time, correlation between epigenetic differences and physical distance among  
342 plants at anthesis (87 DAS) was stronger than at the 4<sup>th</sup> leaf stage (40 DAS), indicating that  
343 exposure to the stressor and positional microclimates both have a cumulative effect on the plant  
344 epigenome. These observations are congruent with the concept that plant adaptive improvisation,  
345 through DNA methylation, is proportional to the severity and duration of the environmental cue to  
346 which the plant was exposed (Soen *et al.*, 2015). In this sense, the scale of the effect induced by  
347 intervention stress (salt) needs to be weighed against those imposed by coincidental stresses  
348 (microenvironment effects) but also by those associated with development or ageing, as was  
349 reported in humans (Gentilini *et al.*, 2015). Any truly stochastic DNA methylation would  
350 represent residual variation. Previous studies have observed the influence of mesoclimatic  
351 conditions (Herrera and Bazaga, 2010) and factors such as temperature (Hashida *et al.*, 2006),  
352 humidity (Tricker *et al.*, 2012) or light (Barneche *et al.*, 2014; Meyer, 2015) on methylome  
353 variability. However, the current study suggests, for the first time, that even slight variations in  
354 climatic factors (temperature, humidity or light) are sufficient to induce modifications in the plant  
355 DNA methylation profile, and that this can be sufficient to mask effects of mild stresses, as was  
356 observed here for salt stress. We certainly do not contend that all nascent methylation arises in  
357 response to environmental or biotic effectors but we do argue that far more care is needed before  
358 discounting unaccounted epigenetic variation as stochastic noise.

#### 359 4.2 Positional effect affects salt stress-induced DNA methylation changes in barley

360 Positional effects in greenhouse experiments are well established and if not properly accounted  
361 for can generate uncharacterised background noise that can mask the effect of the experimental



## Some explanations of stochastic epigenetic mutations

362 treatment (Edmondson, 1989; Guertal and Elkins, 1996; Brien *et al.*, 2013). Spatial variability in  
363 coincident environmental factors has potential to introduce variability between replicate plants'  
364 development and response to experimental treatments (Edmondson, 1989; Guertal and Elkins,  
365 1996). Such spatial variability is liable to introduce flaws in measurements and observations  
366 between replicates that, in fact, were not experiencing exactly the same constraints (Addelman,  
367 1970). This can compromise the search for relationships between experimentally controlled  
368 stressors (in our study, soil salt stress) and perturbations in epigenetic profiles. Indeed, in the  
369 present work the observed negative correlation between RH and differences in epigenetic  
370 differentiation between control and salt stressed pairs of plants growing in the different positions  
371 suggests that variations in environmental factors has interfered with reaction of the plant to mild  
372 salt stress. One possible mechanistic explanation is that the observed West to East decrease in RH  
373 changed the plant's requirement for water (Barnabás *et al.*, 2008; Verslues and Juenger, 2011),  
374 and this in turn may have affected the level of salt stress experienced by each plant. In this way,  
375 plants were grown under the same salt treatment but because they experienced different RH, are  
376 likely to exhibit a different response to the salt stress; hence the inconsistent salt-induced DNA  
377 methylation profiles.

### 378 **4.3 Phenotypic differences associated to greenhouse microclimates correlate with** 379 **epigenetic differences**

380 The finding here of a plastic response by barley plants in terms of biomass and grain yield to  
381 subtle differences associated with greenhouse position corroborates earlier work by Lacaze *et al.*  
382 (2008) who suggested that barley is responsive to fluctuations in ambient conditions. We  
383 postulate that the irregularity of phenotypic variability patterns across barley varieties and  
384 treatments may have emerged from two complementary factors; 1) the genetic variability among  
385 barley varieties leading to differential responsiveness to positional effect, as reported elsewhere  
386 (Lacaze *et al.*, 2008; Kren *et al.*, 2015), and 2) the randomness of spatial microclimatic  
387 conditions, which did not have a linear spatial gradient. The influence of a genotype-by-  
388 environment effect on plant phenotype was expected (Gianoli and Palacio-López, 2009;  
389 Aspinwall *et al.*, 2015), but the scale of phenotypic variation induced by small-scale  
390 environmental variation was not. Our findings highlight the possibility for plants to show  
391 substantial phenotypic responses to even slight variations in ambient conditions, and that  
392 homogeneity in temperature control does not have over-riding importance. Furthermore, our  
393 discovery of a significant correlation between barley MSAP profiles and grain yield suggests that  
394 DNA methylation could at least reflect and possibly contribute towards the plastic variation in  
395 plant phenotypes. These results are in accordance with a mounting body of evidence that plant  
396 plasticity is at least partly epigenetically governed (Boyko and Kovalchuk, 2008; Rois *et al.*,  
397 2013; Baulcombe and Dean, 2014; Aspinwall *et al.*, 2015). Considered together, our results  
398 demonstrate a tight interplay between plant epigenome, environment and phenotype.

## 399 **5 Conclusions**

400 Homogeneity of environmental conditions is practically difficult to obtain in a greenhouse  
401 (Edmondson, 1989; Guertal and Elkins, 1996; Brien *et al.*, 2013). Awareness of plant sensitivity  
402 to microclimate is therefore important, especially in epigenetic studies, where plant epigenomes  
403 seem to be extremely responsive to small fluctuations in environmental factors. This study reveals  
404 that at least some of the DNA methylation previously considered stochastic is likely to have been,  
405 at least partially, induced by 1) positional effects on growth conditions, 2) differences in the  
406 length of plant exposure to relatively trivial variations in environment and 3) synergistic effects of  
407 stress treatment (mild salt stress in this case) and microclimatic conditions. The correlation  
408 between phenotypic DNA methylation differentiations between plants grown in different  
409 microclimates suggests that position-induced DNA methylation, previously ignored or considered

## Some explanations of stochastic epigenetic mutations

410 as stochastic, may be a substantial source of phenotypic variability. Accordingly, we advocate  
411 that future epigenetic analyses should take into account the effect of micro-variations in  
412 environmental factors by careful experimental design and by considering position-induced DNA  
413 methylation markers as strong candidates for finely-tuned response to small environmental  
414 changes. We also propose that further research is needed to untangle microclimate-induced  
415 epigenetic variations from epigenome instability due to experimental treatment and  
416 developmental stage.

### 417 **6 Conflict of Interest**

418 The authors declare that the research was conducted in the absence of any commercial or financial  
419 relationships that could be construed as a potential conflict of interest.

### 420 **7 Author Contributions**

421 M.K. performed the experiments, analysed the data and wrote the manuscript; J.T. performed the  
422 statistical analysis of MSAP peak heights; M.J.W., E.S.S., B.B. and C.M.R.L. conceived the  
423 experiments and supervised the work. All authors read and commented on the manuscript.

### 424 **8 Funding**

425 M.K. was supported by Australian Awards, AusAID (Australian Agency for International  
426 Development); M.J.W. was partly supported by the Biotechnology and Biological Sciences  
427 Research Council (BBS/E/0012843C) and C.M.R.L. is currently partially supported by the  
428 National Institute of Food and Agriculture, U.S. Department of Agriculture, Hatch Program  
429 number 2352987000.

### 430 **9 Acknowledgments**

431 We are grateful to AusAID (Australian Agency for International Development) for providing an  
432 Australian Awards Scholarship to MK for his PhD. The Biotechnology and Biological Sciences  
433 Research Council (BBSRC) strategic program grant (BB CSP1730/1) paid for MW time. We also  
434 acknowledge Olena Kravchuk for contributing to the experimental design, Kate Dowling for the  
435 quality control of environmental data in the greenhouse, and technical staff at The Plant  
436 Accelerator, Australian Plant Phenomics Facility, which is funded under the National  
437 Collaborative Research Infrastructure Strategy of the Australian Commonwealth.

### 438 **10 Supplementary Material**

439 The Supplementary Material for this article can be found online at:

440 **Figure S1:** Correlation between epigenetic distance (Epi-GD) and geometric distance between  
441 plants (cm, centimetre) using the Mantel test, which was performed on data from nine barley  
442 varieties (Barque 73, Buloke, Commander, Fathom, Flagship, Hindmarsh, Maritime, Schooner  
443 and Yarra) and methylation sensitive enzymes *HpaII* (a-f) and *MspI* (g-l). Analyses involved  
444 control and stress plants together (a, b, g and h), control plants only (c, d, i and j) or stress plants  
445 only (e, f, k and l). Correlations were generally lower at 4<sup>th</sup> leaf stage (a, c, e, g, i and k) than at  
446 anthesis (b, d, f, h, j and l), indicating that positional effect is cumulative during plant  
447 development.

448 **Figure S2:** Multiple Correspondence and Linear Discriminant Analyses (MC-LDA) of MSAP  
449 markers in barley varieties (Barque73, Buloke, Fathom, Flagship, Hindmarsh, Maritime,  
450 Schooner and Yarra) under salt stress (75 mM) and control (0 mM) conditions. The panel shows

### Some explanations of stochastic epigenetic mutations

451 density plots of LD function between stress and control plants, at 4th leaf stage (A, D, G, J, M, P,  
452 S, V) and at anthesis (B, E, H, K, N, Q, T, W). Dashed vertical lines represent the mean LD1 in  
453 comparisons of two groups. Graphs of panel C, F, I, L, O, R, U and X are MC-LDA plots  
454 comparing the salt treatment groups at both 4th leaf and anthesis stages.

455 **Figure S3:** Variability of biomass and yield (grammes) between plant positions (P1-5) in the  
456 greenhouse for the nine barley varieties; Barque73, Buloke, Commander, Fathom, Flagship,  
457 Hindmarsh, Maritime, Schooner and Yarra.

458 **Figure S4:** Correlation between epigenetic distance using *HpaII* (a, b) or *MspI* (c, d) profiles and  
459 yield from control (a, c) and stress (b, d) plants (varieties: Barque73, Buloke, Commander,  
460 Fathom, Flagship, Hindmarsh, Maritime, Schooner and Yarra).

461

## Some explanations of stochastic epigenetic mutations

### 462 11 Reference

- 463 Addelman, S. (1970). Variability of treatments and experimental units in the design and analysis  
464 of experiments. *Journal of the American Statistical Association* 65, 1095-1108.
- 465 Aspinwall, M.J., Loik, M.E., Resco De Dios, V., Tjoelker, M.G., Payton, P.R., and Tissue, D.T.  
466 (2015). Utilizing intraspecific variation in phenotypic plasticity to bolster agricultural and  
467 forest productivity under climate change. *Plant, Cell & Environment* 38, 1752-1764.
- 468 Ay, N., Janack, B., and Humbeck, K. (2014). Epigenetic control of plant senescence and linked  
469 processes. *Journal of Experimental Botany*.
- 470 Barnabás, B., Jäger, K., and Fehér, A. (2008). The effect of drought and heat stress on  
471 reproductive processes in cereals. *Plant, Cell and Environment* 31, 11-38.
- 472 Barneche, F., Malapeira, J., and Mas, P. (2014). The impact of chromatin dynamics on plant light  
473 responses and circadian clock function. *Journal of Experimental Botany* 65, 2895-2913.
- 474 Bastow, R., Mylne, J.S., Lister, C., Lippman, Z., Martienssen, R.A., and Dean, C. (2004).  
475 Vernalization requires epigenetic silencing of FLC by histone methylation. *Nature* 427,  
476 164-167.
- 477 Baulcombe, D.C., and Dean, C. (2014). Epigenetic Regulation in Plant Responses to the  
478 Environment. *Cold Spring Harbor Perspectives in Biology* 6.
- 479 Becker, C., Hagemann, J., Müller, J., Koenig, D., Stegle, O., Borgwardt, K., and Weigel, D.  
480 (2011). Spontaneous epigenetic variation in the Arabidopsis thaliana methylome. *Nature*  
481 480, 245-249.
- 482 Benjamini, Y., and Hochberg, Y. (1995). Controlling the false discovery rate: a practical and  
483 powerful approach to multiple testing. *Journal of the Royal Statistical Society. Series B*  
484 (*Methodological*), 289-300.
- 485 Berger, B., Regt, B., and Tester, M. (2012). "Trait dissection of salinity tolerance with plant  
486 phenomics," in *Plant Salt Tolerance*, eds. S. Shabala & T.A. Cuin. Humana Press), 399-  
487 413.
- 488 Bird, A., and Jaenisch, R. (2003). Epigenetic regulation of gene expression: how the genome  
489 integrates intrinsic and environmental signals. *Nature Genetics* 33, 245+.
- 490 Bishop, K.A., Betzelberger, A.M., Long, S.P., and Ainsworth, E.A. (2015). Is there potential to  
491 adapt soybean (*Glycine max Merr.*) to future [CO<sub>2</sub>]? An analysis of the yield response of  
492 18 genotypes in free-air CO<sub>2</sub> enrichment. *Plant, Cell & Environment* 38, 1765-1774.
- 493 Both, A.J., Benjamin, L., Franklin, J., Holroyd, G., Incoll, L.D., Lefsrud, M.G., and Pitkin, G.  
494 (2015). Guidelines for measuring and reporting environmental parameters for experiments  
495 in greenhouses. *Plant Methods* 11, 1-18.
- 496 Boyko, A., and Kovalchuk, I. (2008). Epigenetic control of plant stress response. *Environmental*  
497 *and Molecular Mutagenesis* 49, 61-72.
- 498 Brien, C.J., Berger, B., Rabie, H., and Tester, M. (2013). Accounting for variation in designing  
499 greenhouse experiments with special reference to greenhouses containing plants on  
500 conveyor systems. *Plant Methods* 9, 5.
- 501 Cabrera-Bosquet, L., Fournier, C., Bricchet, N., Welcker, C., Suard, B., and Tardieu, F. (2016).  
502 High-throughput estimation of incident light, light interception and radiation-use  
503 efficiency of thousands of plants in a phenotyping platform. *New Phytologist* 212, 269-  
504 281.



## Some explanations of stochastic epigenetic mutations

- 505 Consuegra, S., and Rodríguez López, C.M. (2016). Epigenetic-induced alterations in sex-ratios in  
506 response to climate change: An epigenetic trap? *BioEssays* 38, 950-958.
- 507 Edmondson, R.N. (1989). Glasshouse Design for Repeatedly Harvested Crops. *Biometrics* 45,  
508 301-307.
- 509 Feinberg, A.P., and Irizarry, R.A. (2010). Stochastic epigenetic variation as a driving force of  
510 development, evolutionary adaptation, and disease. *Proceedings of the National Academy*  
511 *of Sciences* 107, 1757-1764.
- 512 Field, L.M., and Blackman, R.L. (2003). Insecticide resistance in the aphid *Myzus persicae*  
513 (Sulzer): chromosome location and epigenetic effects on esterase gene expression in  
514 clonal lineages. *Biological Journal of the Linnean Society* 79, 107-113.
- 515 Gehring, M., Huh, J.H., Hsieh, T.-F., Penterman, J., Choi, Y., Harada, J.J., Goldberg, R.B., and  
516 Fischer, R.L. (2006). DEMETER DNA Glycosylase Establishes MEDEA Polycomb Gene  
517 Self-Imprinting by Allele-Specific Demethylation. *Cell* 124, 495-506.
- 518 Gentilini, D., Garagnani, P., Pisoni, S., Bacalini, M.G., Calzari, L., Mari, D., Vitale, G.,  
519 Franceschi, C., and Di Blasio, A.M. (2015). Stochastic epigenetic mutations (DNA  
520 methylation) increase exponentially in human aging and correlate with X chromosome  
521 inactivation skewing in females. *Aging* 7, 568-578.
- 522 Gianoli, E., and Palacio-López, K. (2009). Phenotypic integration may constrain phenotypic  
523 plasticity in plants. *Oikos* 118, 1924-1928.
- 524 Guertal, E.A., and Elkins, C.B. (1996). Spatial Variability of Photosynthetically Active Radiation  
525 in a Greenhouse. *Journal of the American Society for Horticultural Science* 121, 321-325.
- 526 Gutzat, R., and Mittelsten Scheid, O. (2012). Epigenetic responses to stress: triple defense?  
527 *Current Opinion in Plant Biology* 15, 568-573.
- 528 Hashida, S.-N., Uchiyama, T., Martin, C., Kishima, Y., Sano, Y., and Mikami, T. (2006). The  
529 Temperature-Dependent Change in Methylation of the Antirrhinum Transposon Tam3 Is  
530 Controlled by the Activity of Its Transposase. *The Plant Cell* 18, 104-118.
- 531 Herrera, C.M., and Bazaga, P. (2010). Epigenetic differentiation and relationship to adaptive  
532 genetic divergence in discrete populations of the violet *Viola cazorlensis*. *New Phytologist*  
533 187, 867-876.
- 534 Herrera, C.M., and Bazaga, P. (2011). Untangling individual variation in natural populations:  
535 ecological, genetic and epigenetic correlates of long-term inequality in herbivory.  
536 *Molecular Ecology* 20, 1675-1688.
- 537 Herrera, C.M., and Bazaga, P. (2013). Epigenetic correlates of plant phenotypic plasticity: DNA  
538 methylation differs between prickly and nonprickly leaves in heterophyllous *Ilex*  
539 *aquifolium* (Aquifoliaceae) trees. *Botanical Journal of the Linnean Society* 171, 441-452.
- 540 Ishida, T., Kurata, T., Okada, K., and Wada, T. (2008). A genetic regulatory network in the  
541 development of trichomes and root hairs. *Annu Rev Plant Biol* 59, 365-386.
- 542 Joyce, S., Cassells, A., and Mohan Jain, S. (2003). Stress and aberrant phenotypes in vitro culture.  
543 *Plant Cell, Tissue and Organ Culture* 74, 103-121.
- 544 Jung, C.-H., O'Brien, M., Singh, M.B., and Bhalla, P. (2015). Epigenetic landscape of germ line  
545 specific genes in the sporophyte cells of *Arabidopsis thaliana*. *Frontiers in Plant Science*  
546 6.
- 547 Karan, R., Deleon, T., Biradar, H., and Subudhi, P.K. (2012). Salt Stress Induced Variation in  
548 DNA Methylation Pattern and Its Influence on Gene Expression in Contrasting Rice  
549 Genotypes. *PLoS ONE* 7, e40203.

## Some explanations of stochastic epigenetic mutations

- 550 Kassambara, A. (2019). "ggpubr: 'ggplot2' Based Publication Ready Plots. R package version  
551 0.2.4.". CRAN).
- 552 Kitimu, S.R., Taylor, J., March, T.J., Tairo, F., Wilkinson, M.J., and Rodriguez Lopez, C.M.  
553 (2015). Meristem micropropagation of cassava (*Manihot esculenta*) evokes genome-wide  
554 changes in DNA methylation. *Frontiers in Plant Science* 6.
- 555 Kohler, C., and Makarevich, G. (2006). Epigenetic mechanisms governing seed development in  
556 plants. *EMBO Rep* 7, 1223-1227.
- 557 Konate, M., Wilkinson, M.J., Mayne, B.T., Pederson, S.M., Scott, E.S., Berger, B., and Rodriguez  
558 Lopez, C.M. (2018). Salt Stress Induces Non-CG Methylation in Coding Regions of  
559 Barley Seedlings (*Hordeum vulgare*). *Epigenomes* 2, 12.
- 560 Konate, M., Wilkinson, M.J., Mayne, B.T., Scott, E.S., Berger, B., and López, C.M.R. (2020).  
561 "Atlas of Age-and Tissue-specific DNA Methylation during Early Development of Barley  
562 (*Hordeum vulgare*)," in *DNA Methylation Mechanism*. IntechOpen).
- 563 Kooke, R., Johannes, F., Wardenaar, R., Becker, F., Etcheverry, M., Colot, V., Vreugdenhil, D.,  
564 and Keurentjes, J.J.B. (2015). Epigenetic Basis of Morphological Variation and  
565 Phenotypic Plasticity in *Arabidopsis thaliana*. *The Plant Cell* 27, 337-348.
- 566 Kren, J., Klem, K., Svobodova, I., Misa, P., and Lukas, V. (2015). Influence of Sowing, Nitrogen  
567 Nutrition and Weather Conditions on Stand Structure and Yield of Spring Barley. *Cereal*  
568 *Research Communications* 43, 326-335.
- 569 Lacaze, X., Hayes, P.M., and Korol, A. (2008). Genetics of phenotypic plasticity: QTL analysis in  
570 barley, *Hordeum vulgare*. *Heredity (Edinb)* 102, 163-173.
- 571 Lê, S., Josse, J., and Husson, F. (2008). FactoMineR: An R Package for Multivariate Analysis.  
572 2008 25, 18.
- 573 Mantel, N. (1967). The detection of disease clustering and a generalized regression approach.  
574 *Cancer Res* 27, 209-220.
- 575 Mccarthy, D.J., Chen, Y., and Smyth, G.K. (2012). Differential expression analysis of multifactor  
576 RNA-Seq experiments with respect to biological variation. *Nucleic Acids Research* 40,  
577 4288-4297.
- 578 Meyer, H.M., and Roeder, A.H.K. (2014). Stochasticity in plant cellular growth and patterning.  
579 *Frontiers in Plant Science* 5, 420.
- 580 Meyer, P. (2015). Epigenetic variation and environmental change. *Journal of Experimental*  
581 *Botany* 66, 3541-3548.
- 582 Murray, F.W. (1967). On the computation of saturation vapor pressure. *Journal of Applied*  
583 *Meteorology* 6, 203-204.
- 584 Peakall, R., and Smouse, P.E. (2012). GenAlEx 6.5: genetic analysis in Excel. Population genetic  
585 software for teaching and research—an update. *Bioinformatics* 28, 2537-2539.
- 586 Pecinka, A., Dinh, H.Q., Baubec, T., Rosa, M., Lettner, N., and Scheid, O.M. (2010). Epigenetic  
587 Regulation of Repetitive Elements Is Attenuated by Prolonged Heat Stress in *Arabidopsis*.  
588 *The Plant Cell* 22, 3118-3129.
- 589 Podio, M., Cáceres, M.E., Samoluk, S.S., Seiyo, J.G., Pessino, S.C., Ortiz, J.P.A., and Pupilli, F.  
590 (2014). A methylation status analysis of the apomixis-specific region in *Paspalum* spp.  
591 suggests an epigenetic control of parthenogenesis. *Journal of Experimental Botany* 65,  
592 6411-6424.

## Some explanations of stochastic epigenetic mutations

- 593 R Core Team, F. (2019). "R: A language and environment for statistical computing". R  
594 Foundation for Statistical Computing, Vienna, Austria).
- 595 Raj, A., and Van Oudenaarden, A. (2008). Stochastic gene expression and its consequences. *Cell*  
596 135, 216-226.
- 597 Reyna-López, G.E., Simpson, J., and Ruiz-Herrera, J. (1997). Differences in DNA methylation  
598 patterns are detectable during the dimorphic transition of fungi by amplification of  
599 restriction polymorphisms. *Molecular and General Genetics MGG* 253, 703-710.
- 600 Robinson, M.D., McCarthy, D.J., and Smyth, G.K. (2010). edgeR: a Bioconductor package for  
601 differential expression analysis of digital gene expression data. *Bioinformatics* 26, 139-  
602 140.
- 603 Robinson, M.D., and Oshlack, A. (2010). A scaling normalization method for differential  
604 expression analysis of RNA-seq data. *Genome Biology* 11, 1-9.
- 605 Rodríguez López, C.M., Morán, P., Lago, F., Espiñeira, M., Beckmann, M., and Consuegra, S.  
606 (2012). Detection and quantification of tissue of origin in salmon and veal products using  
607 methylation sensitive AFLPs. *Food Chemistry* 131, 1493-1498.
- 608 Rois, A., Rodriguez Lopez, C., Cortinhas, A., Erben, M., Espirito-Santo, D., Wilkinson, M., and  
609 Caperta, A. (2013). Epigenetic rather than genetic factors may explain phenotypic  
610 divergence between coastal populations of diploid and tetraploid *Limonium* spp.  
611 (*Plumbaginaceae*) in Portugal. *Bmc Plant Biology* 13, 205.
- 612 Ruxton, G.D., and Colegrave, N. (2011). *Experimental design for the life sciences*. Oxford:  
613 Oxford University Press.
- 614 Sawan, C., Vaissière, T., Murr, R., and Herceg, Z. (2008). Epigenetic drivers and genetic  
615 passengers on the road to cancer. *Mutation Research/Fundamental and Molecular*  
616 *Mechanisms of Mutagenesis* 642, 1-13.
- 617 Soen, Y., Knafo, M., and Elgart, M. (2015). A principle of organization which facilitates broad  
618 Lamarckian-like adaptations by improvisation. *Biology Direct* 10, 1-17.
- 619 Song, J., Angel, A., Howard, M., and Dean, C. (2012). Vernalization – a cold-induced epigenetic  
620 switch. *Journal of Cell Science* 125, 3723-3731.
- 621 Steward, N., Ito, M., Yamaguchi, Y., Koizumi, N., and Sano, H. (2002). Periodic DNA  
622 Methylation in Maize Nucleosomes and Demethylation by Environmental Stress. *Journal*  
623 *of Biological Chemistry* 277, 37741-37746.
- 624 Tricker, P., Rodriguez López, C.M., Gibbings, G., Hadley, P., and Wilkinson, M. (2013a).  
625 Transgenerational, dynamic methylation of stomata genes in response to low relative  
626 humidity. *International Journal of Molecular Sciences* 14, 6674-6689.
- 627 Tricker, P.J., Gibbings, J.G., Rodríguez López, C.M., Hadley, P., and Wilkinson, M.J. (2012).  
628 Low relative humidity triggers RNA-directed de novo DNA methylation and suppression  
629 of genes controlling stomatal development. *Journal of Experimental Botany* 63, 3799-  
630 3813.
- 631 Tricker, P.J., Rodríguez López, C.M., Hadley, P., Wagstaff, C., and Wilkinson, M.J. (2013b). Pre-  
632 conditioning the epigenetic response to high vapor pressure deficit increases the drought  
633 tolerance of *Arabidopsis thaliana*. *Plant Signaling & Behavior* 8, e25974.
- 634 Van Der Graaf, A., Wardenaar, R., Neumann, D.A., Taudt, A., Shaw, R.G., Jansen, R.C.,  
635 Schmitz, R.J., Colomé-Tatché, M., and Johannes, F. (2015). Rate, spectrum, and  
636 evolutionary dynamics of spontaneous epimutations. *Proceedings of the National*  
637 *Academy of Sciences* 112, 6676-6681.

### Some explanations of stochastic epigenetic mutations

- 638 Vanyushin, B.F. (2006). "DNA Methylation in Plants," in *DNA Methylation: Basic Mechanisms*,  
639 eds. W. Doerfler & P. Böhm. Springer Berlin Heidelberg), 67-122.
- 640 Verhoeven, K.J.F., Jansen, J.J., Van Dijk, P.J., and Biere, A. (2010). Stress-induced DNA  
641 methylation changes and their heritability in asexual dandelions. *New Phytologist* 185,  
642 1108-1118.
- 643 Verslues, P.E., and Juenger, T.E. (2011). Drought, metabolites, and Arabidopsis natural variation:  
644 a promising combination for understanding adaptation to water-limited environments.  
645 *Current Opinion in Plant Biology* 14, 240-245.
- 646 Vogt, G. (2015). Stochastic developmental variation, an epigenetic source of phenotypic diversity  
647 with far-reaching biological consequences. *Journal of Biosciences* 40, 159-204.
- 648 Walder, R.Y., Langtimm, C.J., Chatterjee, R., and Walder, J.A. (1983). Cloning of the MspI  
649 modification enzyme. The site of modification and its effects on cleavage by MspI and  
650 HpaII. *J Biol Chem* 258, 1235-1241.
- 651 Wang, Q.-M., Wang, L., Zhou, Y., Cui, J., Wang, Y., and Zhao, C. (2016). Leaf patterning of  
652 *Clivia miniata* var. *variegata* is associated with differential DNA methylation. *Plant Cell*  
653 *Reports* 35, 167-184.
- 654 Wilcoxon, F. (1945). Individual Comparisons by Ranking Methods. *Biometrics Bulletin* 1, 80-83.
- 655 Xie, H., Konate, M., Sai, N., Tesfamichael, K.G., Cavagnaro, T., Gilliam, M., Breen, J., Metcalfe,  
656 A., Stephen, J.R., De Bei, R., Collins, C., and Lopez, C.M.R. (2017). Global DNA  
657 Methylation Patterns Can Play a Role in Defining Terroir in Grapevine (*Vitis vinifera* cv.  
658 Shiraz). *Frontiers in Plant Science* 8, 1860-1860.
- 659 Yaish, M.W., Colasanti, J., and Rothstein, S.J. (2011). The role of epigenetic processes in  
660 controlling flowering time in plants exposed to stress. *Journal of Experimental Botany* 62,  
661 3727-3735.
- 662 Zilberman, D., and Henikoff, S. (2007). Genome-wide analysis of DNA methylation patterns.  
663 *Development* 134, 3959-3965.
- 664
- 665



## Some explanations of stochastic epigenetic mutations

666

667 Table 1: List and description of barley genotypes used in this study

| No | Variety   | Earliness | Year* of release | Pedigree*                         |                                                   |
|----|-----------|-----------|------------------|-----------------------------------|---------------------------------------------------|
|    |           |           |                  | Parent 1                          | Parent 2                                          |
| 1  | Barque 73 | 6         | 1997             | Triumph                           | Galleon                                           |
| 2  | Buloke    | 5         | 2005             | Franklin/VB9104                   | VB9104                                            |
| 3  | Commander | 5         | 2009             | Keel/Sloop                        | Galaxy                                            |
| 4  | Fathom    | 6         | 2011             | NA                                | NA                                                |
| 5  | Flagship  | 5         | 2006             | Chieftan/Barque                   | Manley/VB9104                                     |
| 6  | Hindmarsh | 6         | 2007             | Dash                              | VB9409                                            |
| 7  | Maritime  | 6         | 2004             | Dampier/A14//Krisna/3<br>/Clipper | M11/4/DampierA14//Krisna/3<br>/Dampier/A14//Union |
| 8  | Schooner  | 5         | 1983             | Proctor/PrioA (WI2128)            | Proctor/CI3578 (WI2099)                           |
| 9  | Yarra     | 5         | 2005             | VB9018/Alexis/VB9104              | NA                                                |

668 Earliness to flowering score is based on a 0-9 scale, with 0 indicating very late varieties and 9  
669 very early ones (SARDI, 2015). \*Year of release and pedigree after Menz (2010), NA = not  
670 available.

671

### Some explanations of stochastic epigenetic mutations

672 Table 2: Adapter and primer sequences used for the MSAP (Rodríguez López et al., 2012).

| Oligo name                 | Function            | Sequence             |
|----------------------------|---------------------|----------------------|
| HpaII/MspI adaptor Reverse | Adapter             | CGCTCAGGACTCAT       |
| HpaII/MspI adaptor Forward | Adapter             | GACGATGAGTCCTGAG     |
| EcoRI adaptor Reverse      | Adapter             | AATGGTACGCAGTCTAC    |
| EcoRI adaptor Forward      | Adapter             | CTCGTAGACTGCGTACC    |
| Pre-EcoRI                  | Preselective primer | GACTGCGTACCAATTCA    |
| Pre-HpaII/MspI             | Preselective primer | GATGAGTCCTGAGCGGC    |
| EcoRI-ATG                  | Selective primer    | GACTGCGTACCAATTCATG  |
| EcoRI_AAG                  | Selective primer    | GACTGCGTACCAATTC AAG |
| HpaII/MspI_CCA             | Selective primer    | GATGAGTCCTGAGCGGCCA  |
| HpaII/MspI_CAA             | Selective primer    | GATGAGTCCTGAGCGGCAA  |

673

674

### Some explanations of stochastic epigenetic mutations

675

676 Table 3: Correlation between pairwise epigenetic distance and physical distance. Nine barley  
 677 varieties were used, comprising ten individuals per variety, five replicates for control and stress  
 678 plants. Samples were collected from the 4<sup>th</sup> leaf (at 4<sup>th</sup> leaf stage) and flag leaf (at anthesis).  
 679 Epigenetic distances correspond to the Phi statistics of the MSAP markers between plant  
 680 individuals. The coefficient of determination ( $R^2$ ) was calculated according to Mantel (1967)  
 681 using GenAlex 6.5. Asterisks (\*), (\*\*) and (\*\*\*) indicate significant correlation between  
 682 treatments for P-value < 0.05, 0.01 and 0.001, respectively, estimated based on 9999  
 683 permutations.

| Varieties | Coefficient of determination ( $R^2$ ) |           |             |           |
|-----------|----------------------------------------|-----------|-------------|-----------|
|           | <i>HpaII</i>                           |           | <i>MspI</i> |           |
|           | 4th leaf                               | Anthesis  | 4th leaf    | Anthesis  |
| Barque73  | 0.003                                  | 0.320**   | 0.010       | 0.315     |
| Buloke    | 0.103*                                 | 0.001     | 0.059       | 0.220*    |
| Commander | 0.052                                  | 0.332**   | 0.050       | 0.332**   |
| Fathom    | 0.038                                  | 0.425**** | 0.079*      | 0.527**** |
| Flagship  | 0.038                                  | 0.451**** | 0.001       | 0.214*    |
| Hindmarsh | 0.008                                  | 0.305**   | 0.004       | 0.233*    |
| Maritime  | 0.014                                  | 0.130*    | 0.071*      | 0.144*    |
| Schooner  | 0.112*                                 | 0.476**** | 0.120*      | 0.447***  |
| Yarra     | 0.002                                  | 0.147*    | 0.027       | 0.385*    |
| Average   | 0.041                                  | 0.287     | 0.047       | 0.313     |

684

685

## Some explanations of stochastic epigenetic mutations

686

687 Table 4: List of salt-induced methylation marker alleles showing significant peak height  
688 differences between the five experimental blocks. logFC = log fold change; logCPM = log counts per  
689 million; LR = likelihood ratio statistics; FDR = false discovery rate.

| Variety  | Sample tissue    | Enzyme/Primer         | allele | logFC  | logCPM | LR     | PValue | FDR   |
|----------|------------------|-----------------------|--------|--------|--------|--------|--------|-------|
| Barque73 | Flag leaf        | <i>HpaII</i> /ATG-CAA | 403.76 | 0.884  | 12.895 | 12.082 | 0.001  | 0.019 |
| Barque73 | Flag leaf        | <i>HpaII</i> /ATG-CAA | 221.61 | -1.749 | 14.043 | 9.817  | 0.002  | 0.032 |
| Flagship | 4th leaf         | <i>HpaII</i> /ATG-CAA | 221.61 | -1.202 | 13.901 | 10.507 | 0.001  | 0.036 |
| Yarra    | Leaf before flag | <i>HpaII</i> /ATG-CAA | 361.55 | -0.653 | 12.238 | 10.505 | 0.001  | 0.036 |
| Yarra    | Leaf before flag | <i>HpaII</i> /ATG-CAA | 167.6  | -0.796 | 12.866 | 8.726  | 0.003  | 0.040 |
| Yarra    | Leaf before flag | <i>HpaII</i> /ATG-CAA | 543.70 | 0.816  | 12.508 | 8.286  | 0.004  | 0.040 |

690

691

692



### Some explanations of stochastic epigenetic mutations

693 Table 5: Correlation between epigenetic distance and grain yield of nine barley varieties.  
 694 Epigenetic distance between plants was calculated based on MSAP data generated using *HpaII*  
 695 and *MspI*. Coefficients of determination ( $R^2$ ) were computed according to Mantel (1967) using  
 696 five replicates for each treatment per variety. Asterisks (\*) and (\*\*) indicate significant  
 697 correlation between treatments for P-value < 0.05, and 0.01, respectively, estimated based on  
 698 9999 permutations.

| Varieties | Coefficient of determination ( $R^2$ ) |             |                     |             |
|-----------|----------------------------------------|-------------|---------------------|-------------|
|           | Control (0 mM NaCl)                    |             | Stress (75 mM NaCl) |             |
|           | <i>HpaII</i>                           | <i>MspI</i> | <i>HpaII</i>        | <i>MspI</i> |
| Barque73  | 0.843                                  | 0.483       | 0.525               | 0.921*      |
| Buloke    | 0.405*                                 | 0.445*      | 0.269*              | 0.164*      |
| Commander | 0.447                                  | 0.663*      | 0.911               | 0.897*      |
| Fathom    | 0.030                                  | 0.247*      | 0.004               | 0.039       |
| Flagship  | 0.394                                  | 0.393       | 0.815*              | 0.886       |
| Hindmarsh | 0.310                                  | 0.003       | 0.468               | 0.503       |
| Maritime  | 0.271                                  | 0.902*      | 0.590*              | 0.855*      |
| Schooner  | 0.907*                                 | 0.828*      | 0.841**             | 0.807*      |
| Yarra     | 0.778                                  | 0.834*      | 0.000               | 0.060       |
| Average   | 0.487                                  | 0.533       | 0.492               | 0.570       |

699

700

## Some explanations of stochastic epigenetic mutations

701

702 Figure 1: Experimental layout and plan of the greenhouse (24 m<sup>2</sup>). Blocks 1, 3, 4, 6 and 8 were  
703 used in this study and are respectively assigned to positions P1 to P5. Blocks 2, 5, and 7 contained  
704 empty pots. Four sensor-nodes (Node A, B, C, and D) were placed along benches, 2 metres apart  
705 and one metre from the East and West walls. Circles represent plant position in the block: hollow  
706 circles are control plants (0 mM NaCl) and full circles are treated plants (75 mM NaCl). Colours  
707 indicate barley varieties: ●● = Barque73; ●● = Buloke; ●● = Commander; ●● = Fathom; ●● =  
708 Flagship; ●● = Hindmarsh; ●● = Maritime ●● = Schooner; ●● = Yarra; ● = Sensor-nodes. AC  
709 = air conditioning unit.

710

711

712

## Some explanations of stochastic epigenetic mutations

713

714 Figure 2: Average daily fluctuations of climatic conditions in the greenhouse. (A) light, (B)  
715 temperature and (C) relative humidity were recorded over the period from 26 June to 12 October  
716 2015, at four positions (Node A-D from West to East) in the greenhouse.

### Some explanations of stochastic epigenetic mutations

717

718 Figure 3: Variability of climatic factors in the greenhouse. The boxplots show variations within  
719 positions and compare data between sensor-nodes based on Wilcoxon paired signed-test.  
720 Asterisks (\*), (\*\*) and (\*\*\*) indicate the significance of the difference between positions (nodes)  
721 for P-value < 0.05, 0.01 and 0.001, respectively; ns = difference not significant. The PAR was  
722 deemed as null at night.

723



### Some explanations of stochastic epigenetic mutations

724

725 Figure 4: Principal coordinates analysis (PCoA) of MSAP (methylation sensitive amplified  
726 polymorphism) markers in barley variety Commander. MSAP markers were generated using five  
727 replicates of control (0 mM NaCl) and stress (75 mM NaCl) plant samples, for *Hpa*II (A) and  
728 *Msp*I (B). Positions 1 to 5 indicate experimental block numbers; Symbols filled in black and  
729 hollow symbols represent salt stress (-S) and control (-C) samples, respectively. The PCoAs show  
730 sample distribution in the first two principal coordinates. Numbers in brackets represent the  
731 proportion of variation explained by the coordinate.

732

### Some explanations of stochastic epigenetic mutations

733

734 Figure 5: Correlation between pairwise epigenetic distance (Epi GD) and plant position in the  
735 greenhouse. The epigenetic distance was estimated at 4<sup>th</sup> leaf stage (a, c; 40 days after sowing)  
736 and anthesis (c, d; 87 days after sowing) of barley variety Schooner, using *HpaII* (a, b) and *MspI*  
737 (c, d) for the MSAP (methylation sensitive amplified polymorphism) analysis. Five replicates of  
738 control (0 mM NaCl) and stress (75 mM NaCl) were analysed together and dots represent  
739 pairwise comparisons between individual plants. Equations represent the formula of the  
740 regression line,  $R^2$  represents the coefficient of determination, calculated according to Mantel  
741 (1967) using GenAlex 6.5. Asterisks (\*) and (\*\*\*) indicate significant correlation between  
742 treatments for P-value < 0.05 and 0.001, respectively, estimated based on 9999 permutations.

743

744

## Some explanations of stochastic epigenetic mutations

745

746 Figure 6: Exemplars of MSAP (methylation sensitive amplified polymorphism) alleles that show  
747 significant differences in peak height between positions in the greenhouse. Markers were detected  
748 in control (0 mM NaCl, red symbols) and stress (75 mM NaCl, blue symbols) plants; Vertical axis  
749 shows logarithm 2 ( $\log_2$ ) of peak height intensity and the horizontal axis represents positions in  
750 the greenhouse, in the West to East direction. The grey number in each plot represents  $-\log_{10}$  of  
751 p-values. The title of each plot shows the enzyme used (either *HpaII* (HPA) or *MspI* (MSP), the  
752 variety, and the allele identity number.

753

### **Some explanations of stochastic epigenetic mutations**

754 Figure 7: Multiple Correspondence and Linear Discriminant Analyses (MC-LDA) of MSAP  
755 markers in barley variety Commander under salt stress (75 mM) and control (0 mM) conditions.  
756 The panel shows density plots of LD function between stress and control plants, at 4th leaf stage  
757 (A) and at anthesis (B). Dashed vertical lines represent the mean LD1 in 2 groups' comparisons.  
758 The graph C shows MC-LDA plots comparing the salt treatment groups at both 4th leaf and  
759 anthesis stages. Similar plots for the other varieties are presented in supplementary Figure S2.

760

### Some explanations of stochastic epigenetic mutations

761

762 Figure 8: Box plots showing biomass and grain yield range per position (P1-5) in the greenhouse  
763 (n = 9). (a) biomass per position for control and stress plants; (b) grain yield per position for  
764 control and stress plants; The average data was obtained from nine barley varieties (Barque 73,  
765 Buloke, Commander, Fathom, Flagship, Hindmarsh, Maritime, Schooner and Yarra).

766

## Some explanations of stochastic epigenetic mutations

767

768

769 Figure 9: Correlation between pairwise epigenetic distance (EpiGD) and pairwise difference in  
770 grain yield between plants of the variety Schooner. The correlation was tested according to  
771 Mantel (1967) using GenAlex 6.5. Epigenetic distance between plants was calculated based on  
772 MSAP (methylation sensitive amplified polymorphism) data generated using *HpaII* (a, b) and  
773 *MspI* (c, d). Pairwise differences in grain yield between plants were calculated separately for  
774 control (a, c) and stress (b, d) plants. Values of grain yield were normalized by computing the  
775 ratio of each individual plant grain yield over the mean grain yield for the same treatment across  
776 all positions. The dots represent pairwise comparisons between individual plants; equations  
777 represent the formulae of the regression line;  $R^2$  represents the coefficient of determination of the  
778 Mantel test; asterisk (\*) and (\*\*) indicate significant correlation between treatments for P-value <  
779 0.05, and 0.01, respectively, estimated based on 9999 permutations.

780

781



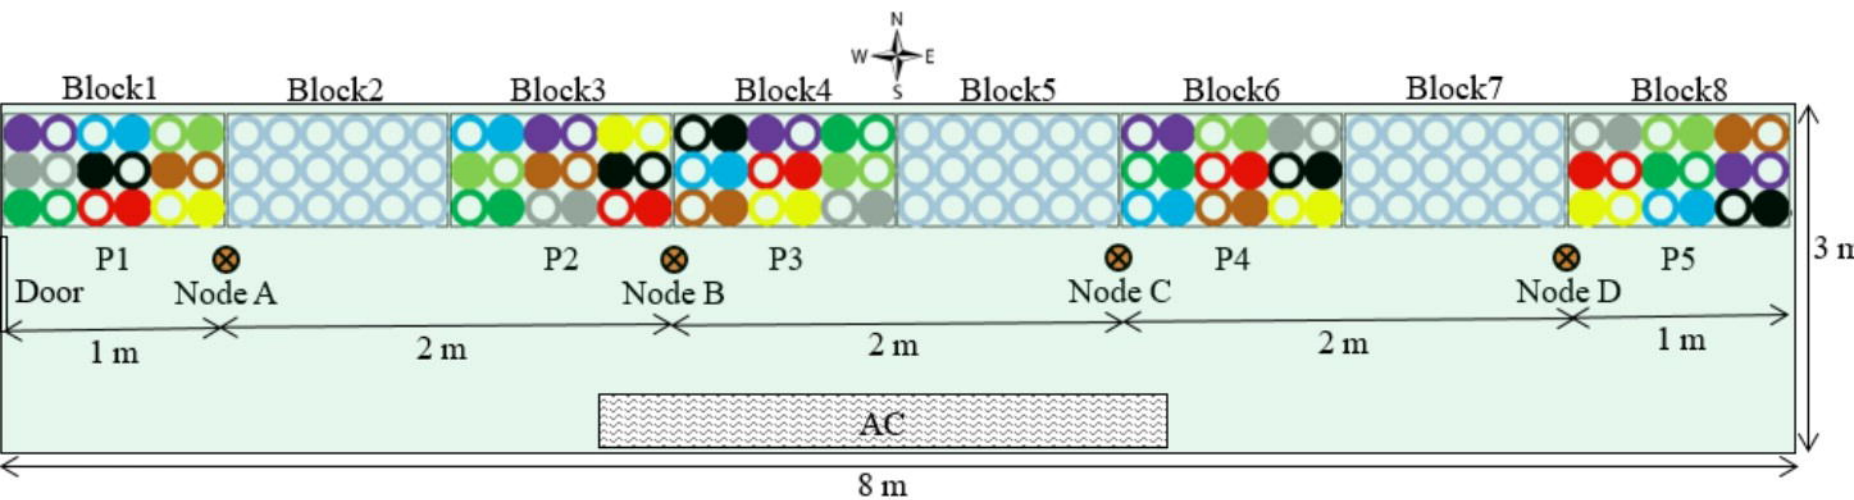

..... NodeA    - - - NodeB    — NodeC    — NodeD

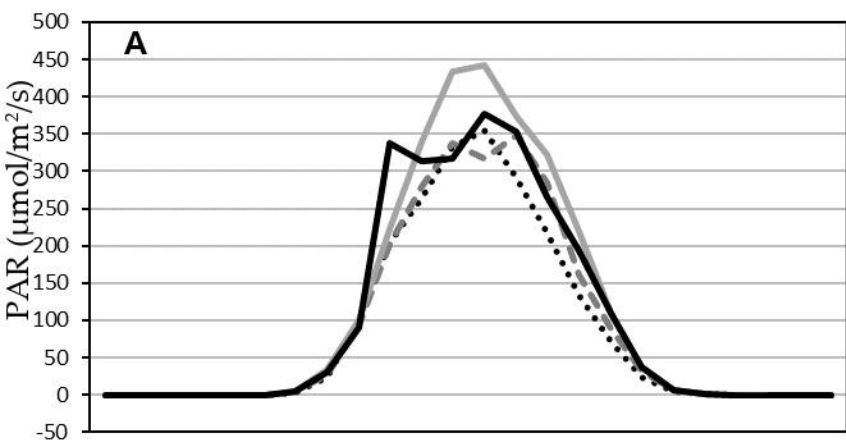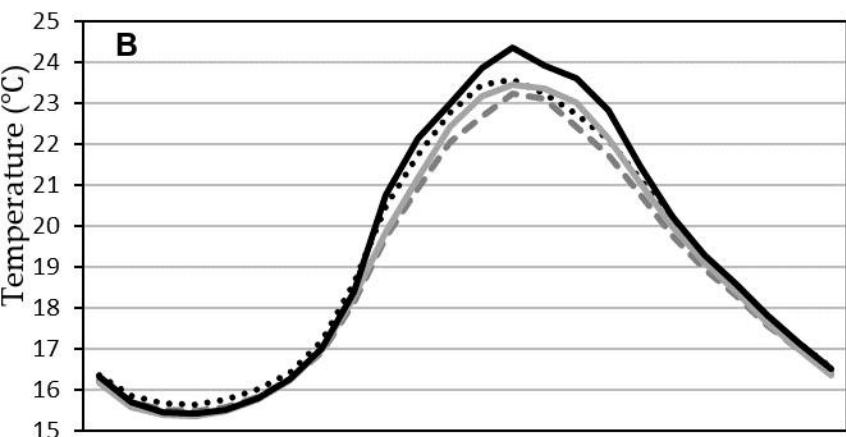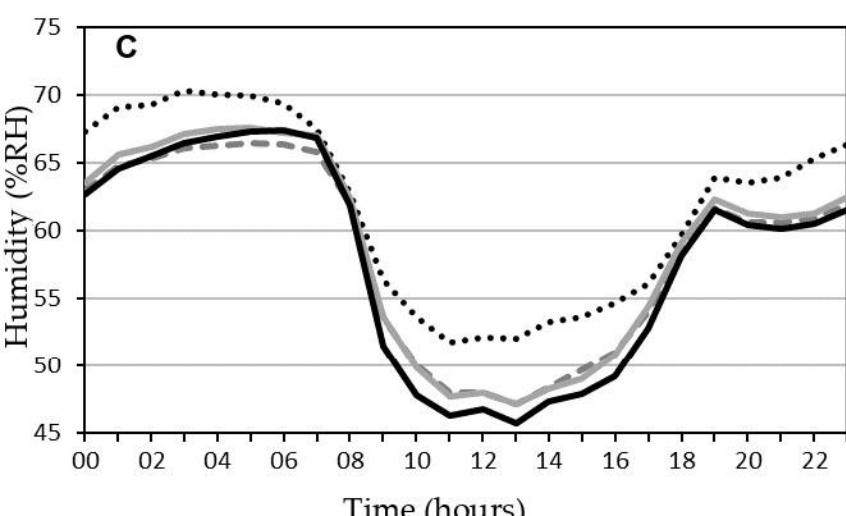

Day

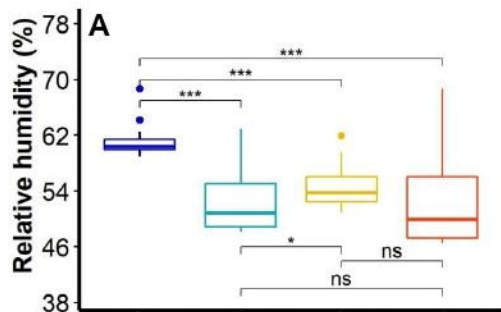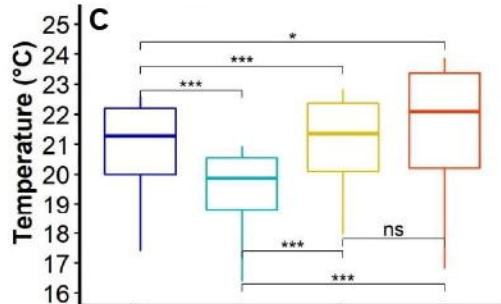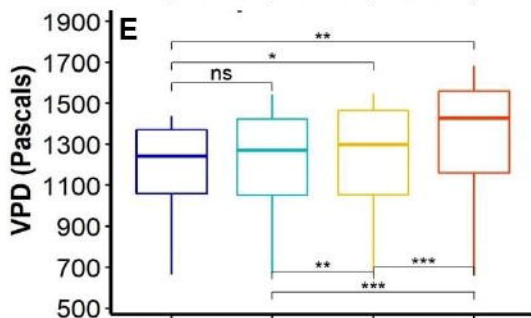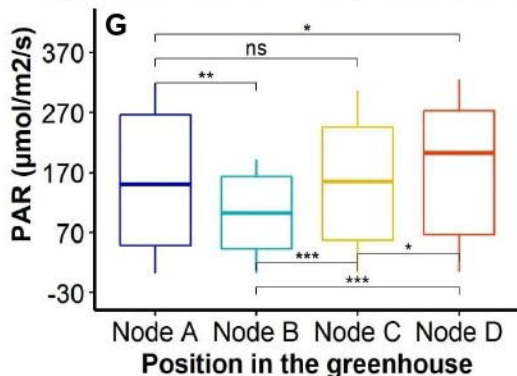

Night

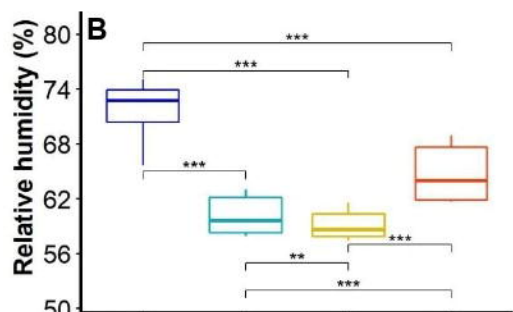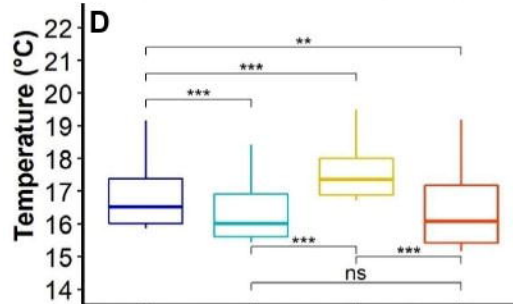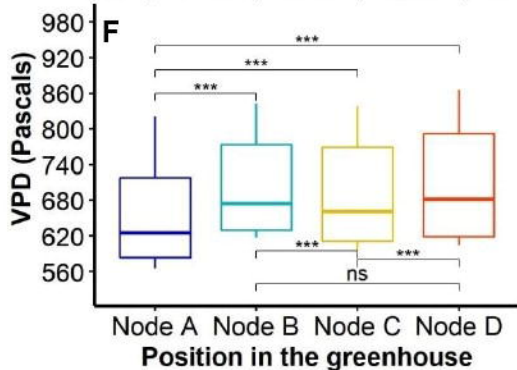

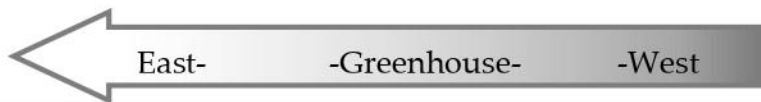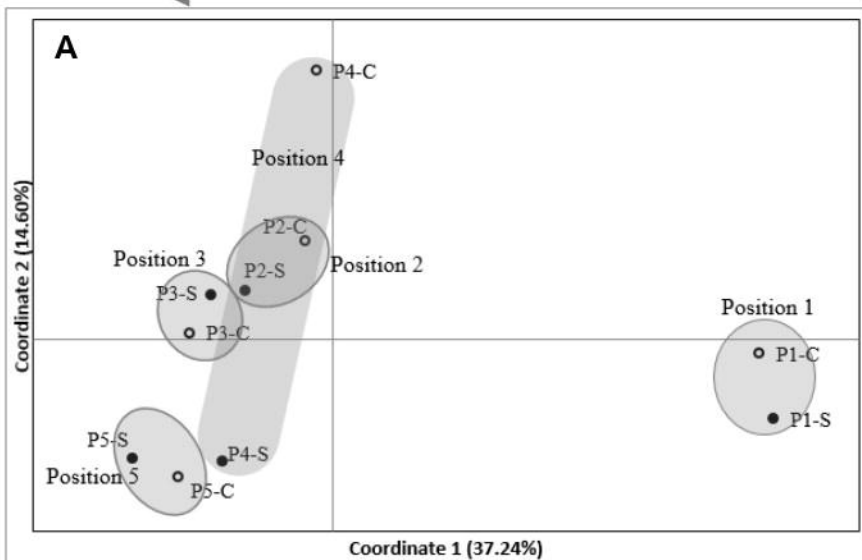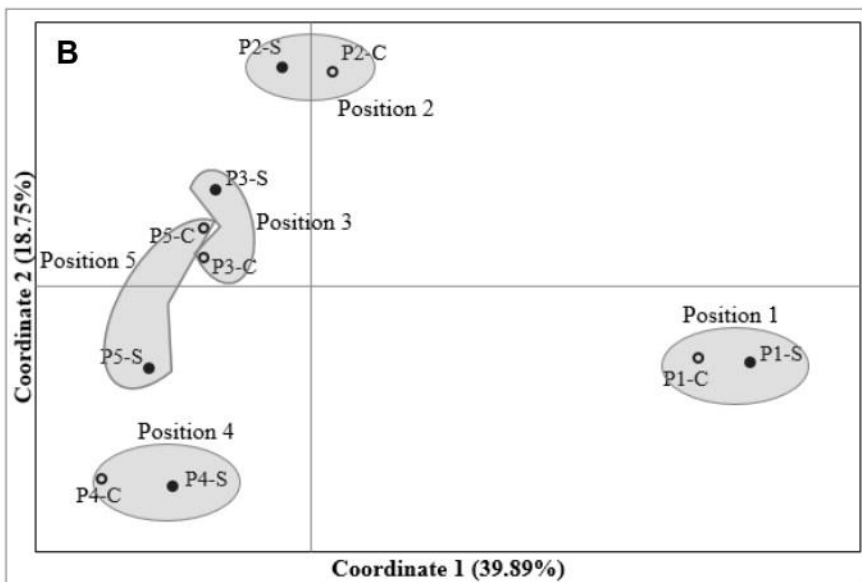

**A 4th leaf Hpall**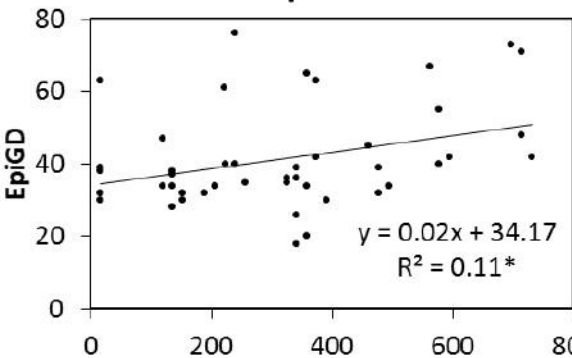**B Anthesis Hpall**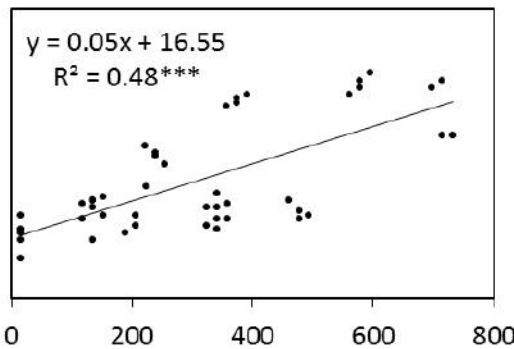**C 4th leaf MspI**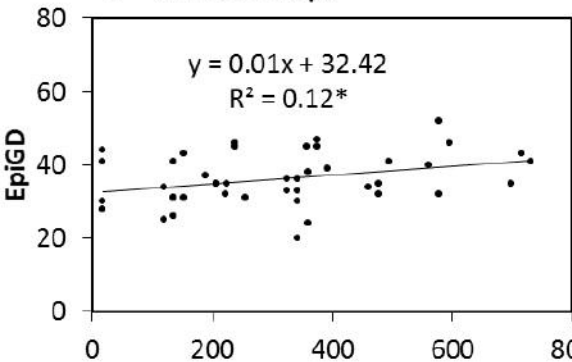**D Anthesis MspI**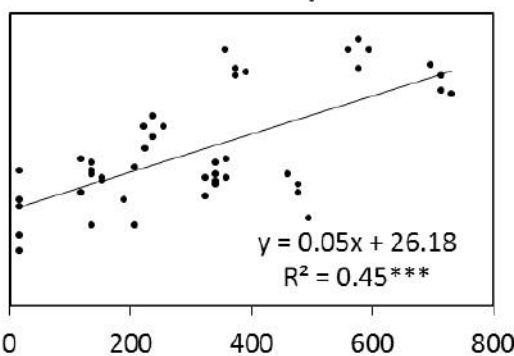

0mM ■ 75mM ●

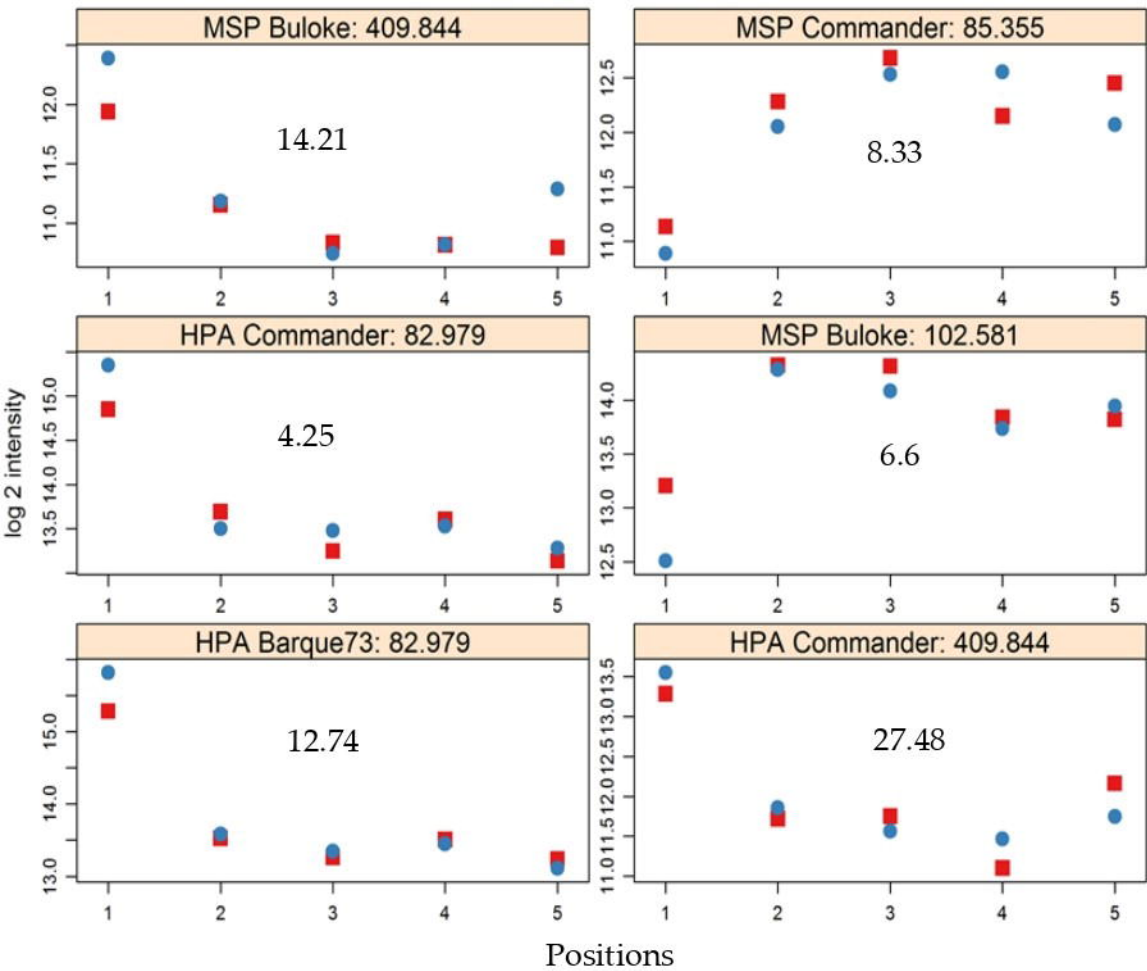



Control (0 mM NaCl)  
Stress (75 mM NaCl)

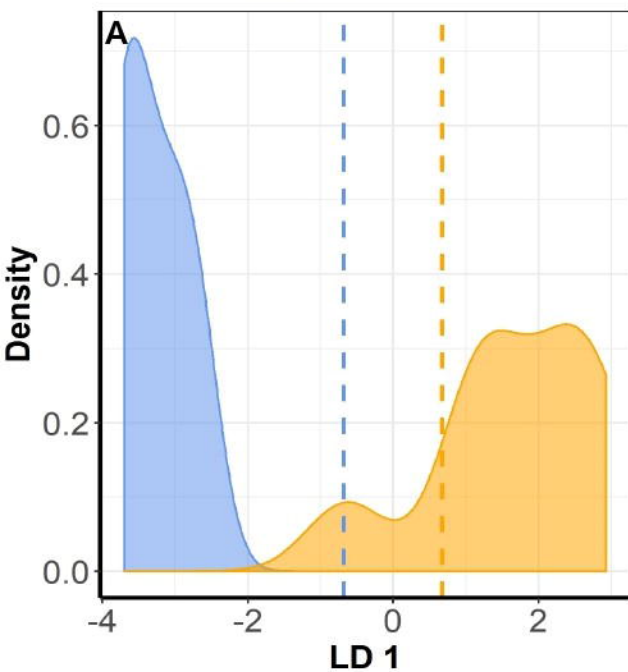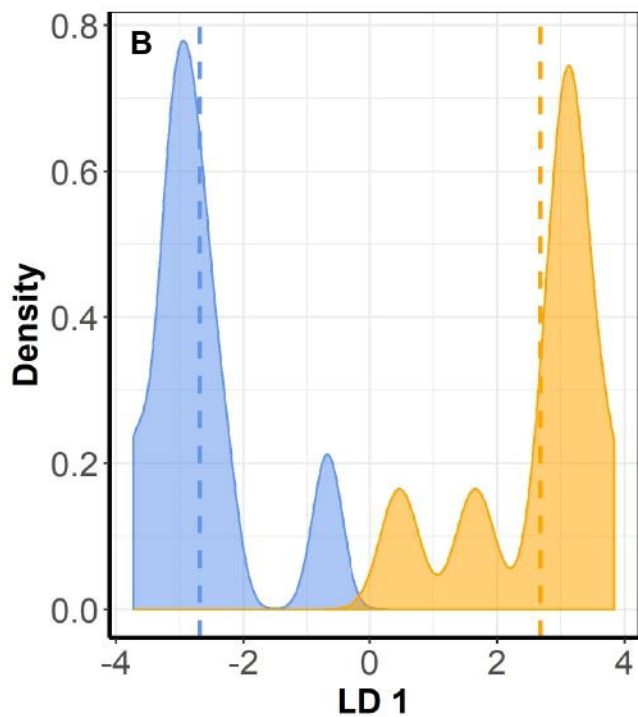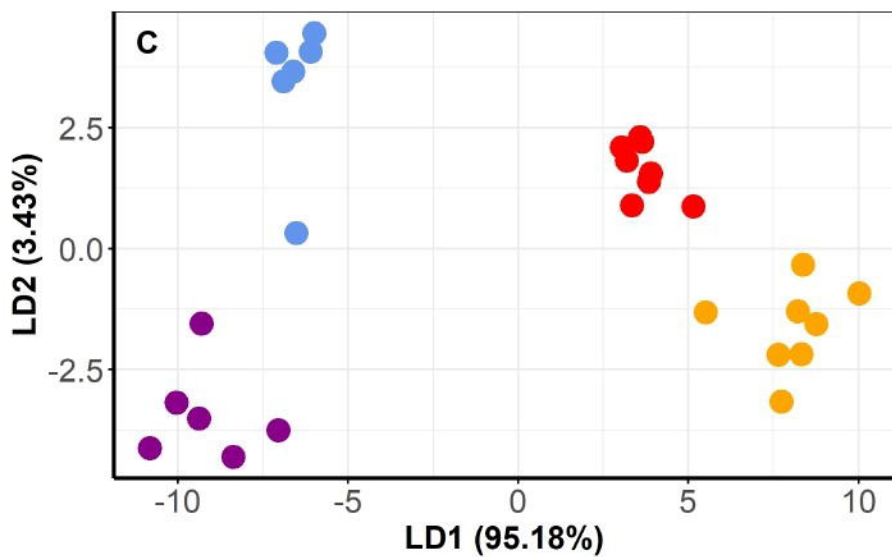

● 4th leaf, 0 mM ● 4th leaf, 75 mM ● Anthesis, 0 mM ● Anthesis, 75 mM

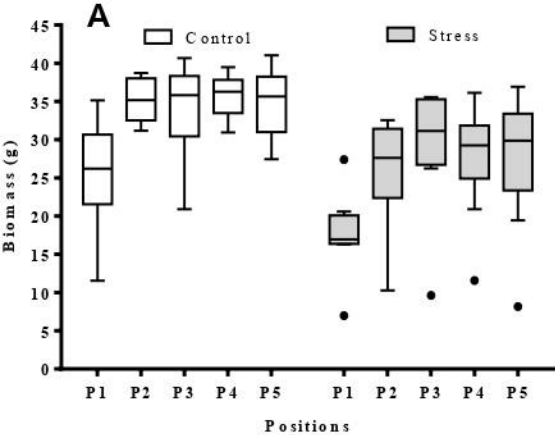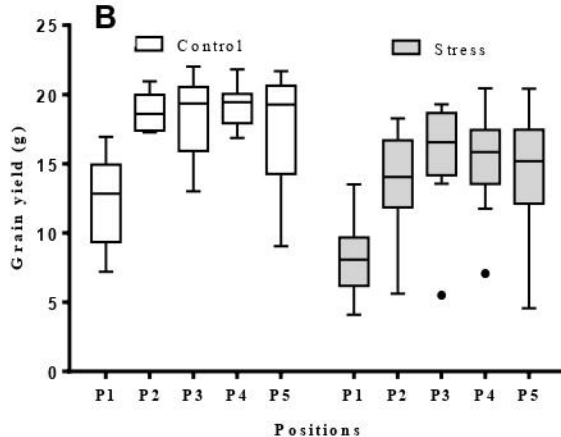

**A** *Hpall*, Control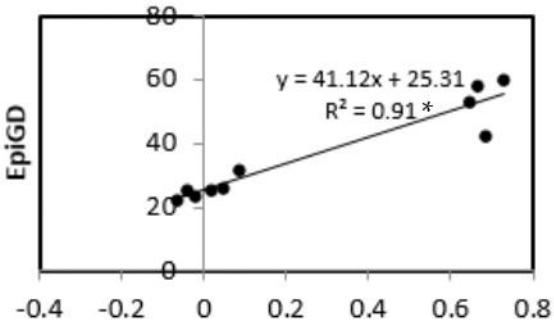**B** *Hpall*, Stress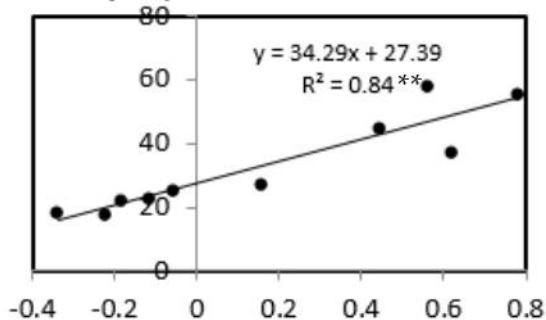**C** *Mspl*, Control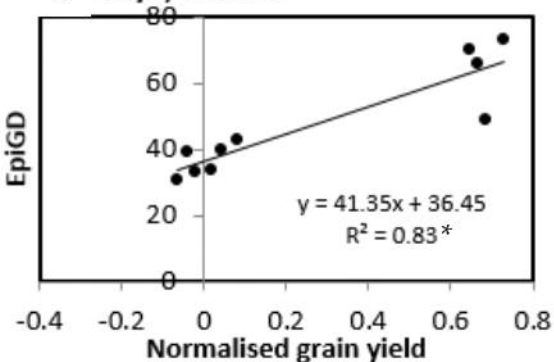**D** *Mspl*, Stress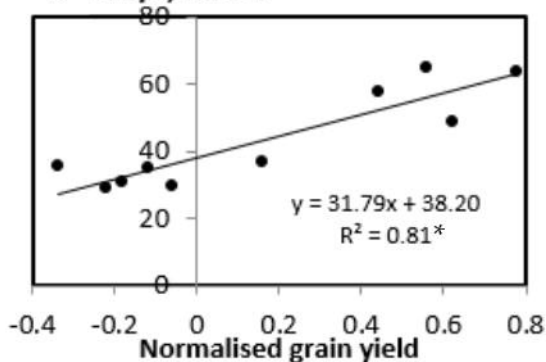

Source: https://www.biorxiv.org/content/biorxiv/early/2020/04/21/2020.04.20.051326.full.pdf
